# Supplementary material for: Towards the electrochemical diagnostic of influenza virus: development of a graphene–Au hybrid nanocomposite modified influenza virus biosensor based on neuraminidase activity
Source: Royal Society of Chemistry journal article supplement (doi:10.1039/c7an01537b), 2017-10-26
Supplement: c7an01537b1.pdf [file c7an01537b1.pdf]

## Supporting Information

### **Towards the Electrochemical Diagnostic of Influenza Virus: Development of Graphene-Au Hybrid Nanocomposite Modified Influenza Virus Biosensor Based on Neuraminidase Activity**

Ulku Anik\*<sup>†</sup>, Yudum Tepeli<sup>†</sup>, Maher Sayhi<sup>††,§</sup>, Jihene Nsiri<sup>††</sup>, Mohamed Fethi Diouani\*<sup>††</sup>

<sup>†</sup> Mugla Sitki Kocman University, Faculty of Science, Chemistry Department, Kotekli/Mugla.

<sup>††</sup> Laboratory of Epidemiology and Veterinary Microbiology (LEMV), Institut Pasteur de Tunis, University of Tunis El Manar, LR11IPT03, Tunis-Belvédère 1002, Tunisia.

<sup>§</sup> Faculty of Sciences of Tunis, University of Tunis El Manar, Tunisia.

#### **Corresponding Authors**

[ulkuanik@mu.edu.tr](mailto:ulkuanik@mu.edu.tr); [fethidiouani@gmail.com](mailto:fethidiouani@gmail.com)

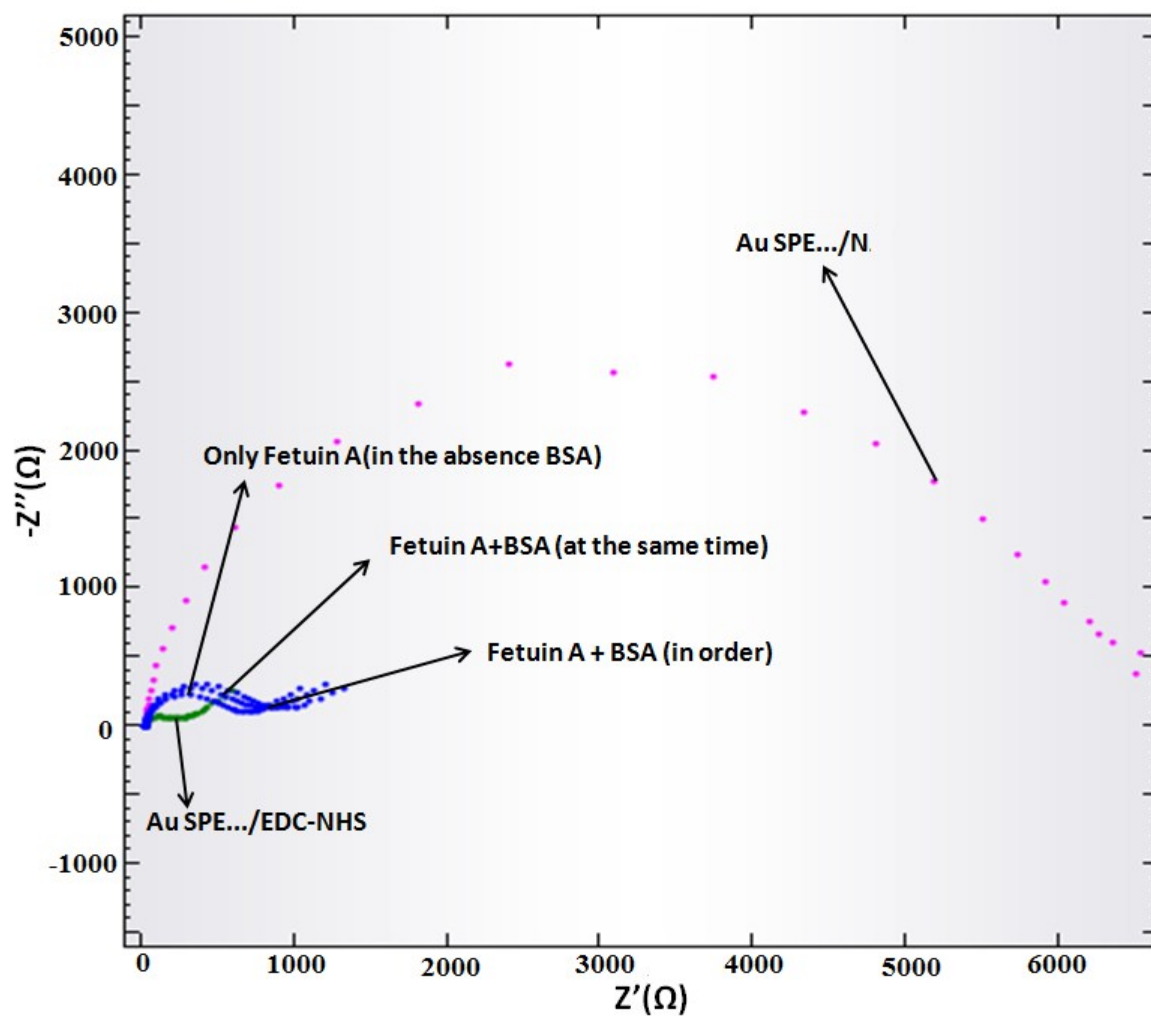

Figure S1. Nyquist plots which belongs to the effect of BSA on developed influenza A biosensor.

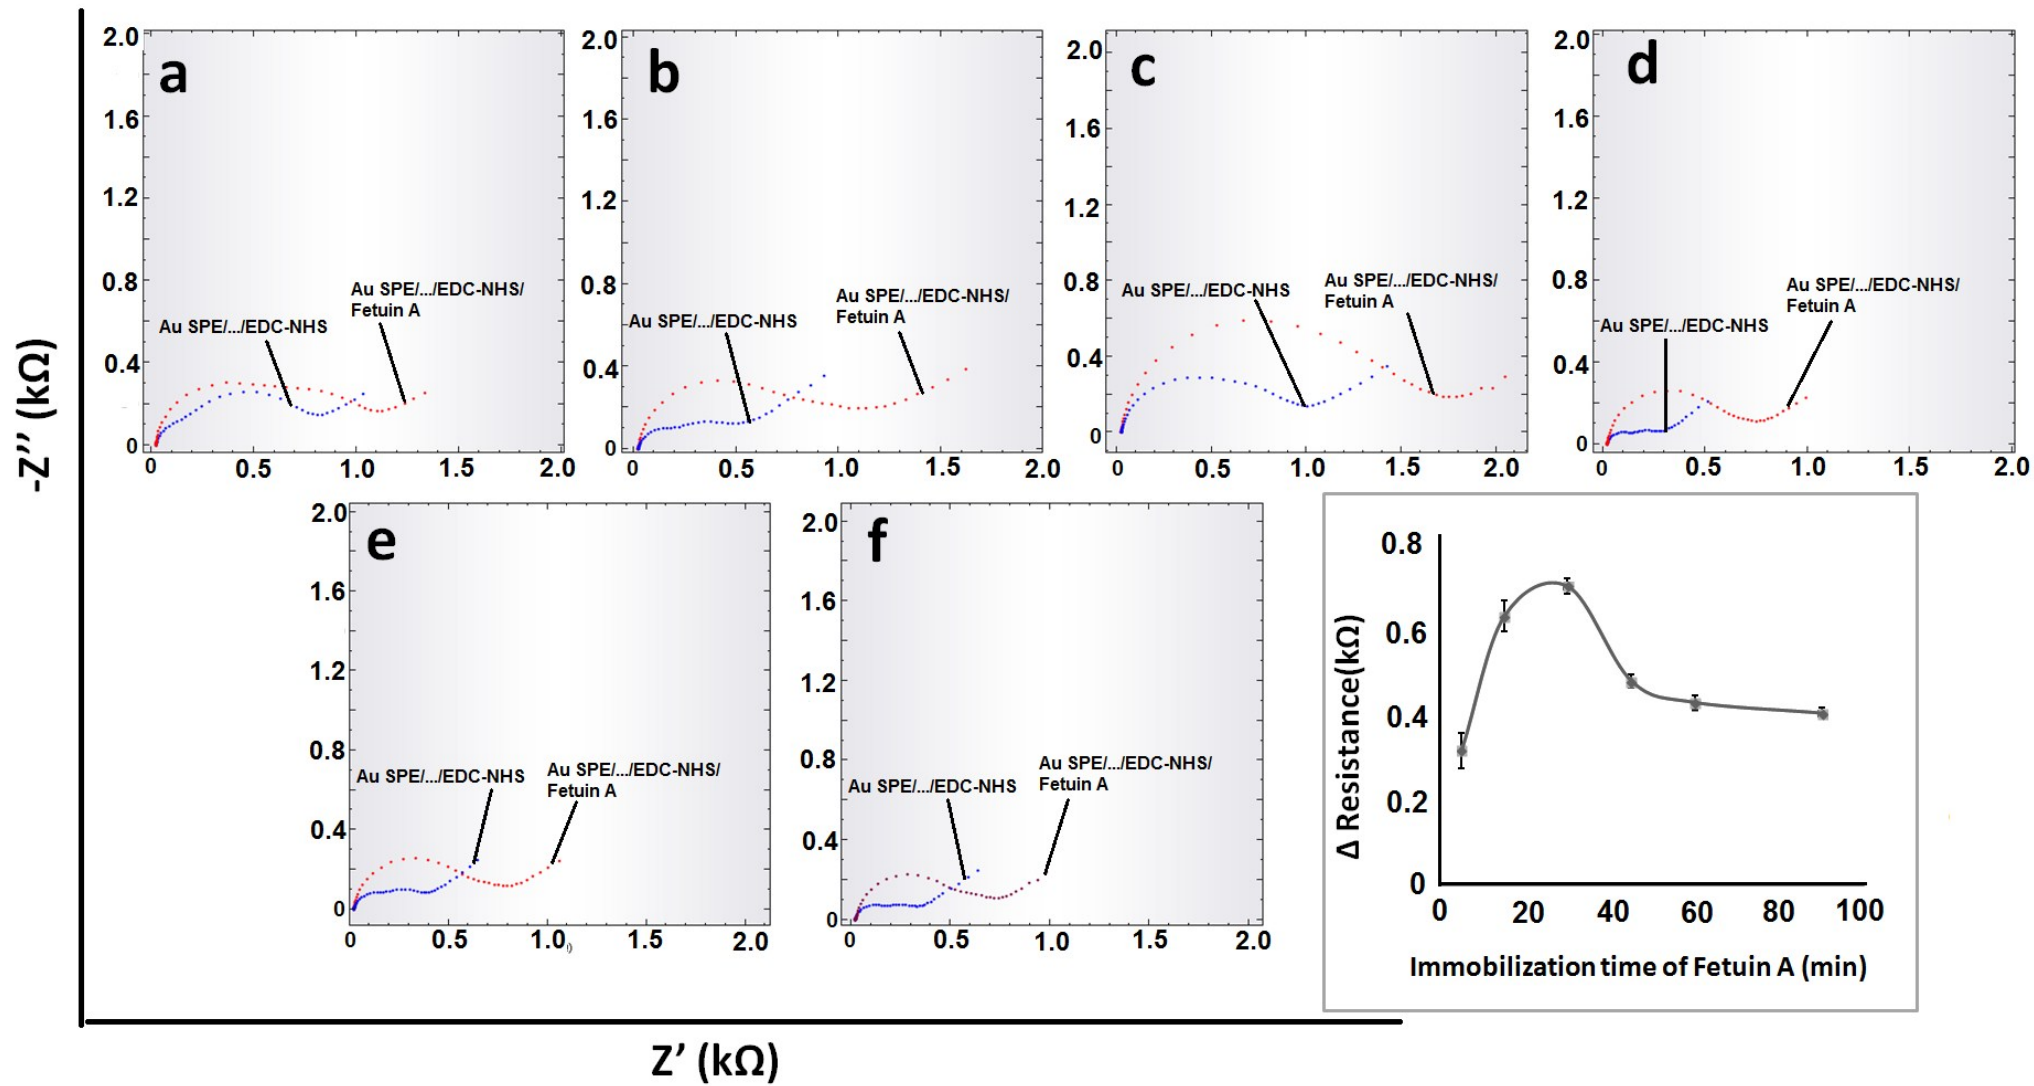

Figure S2. Nyquist plots of different immobilization time of fetuin A and excel plots; a) 5 min, b) 15 min, c) 30 min, d) 45 min, e) 60 min, f) 90 min and optimization graph of fetuin A.

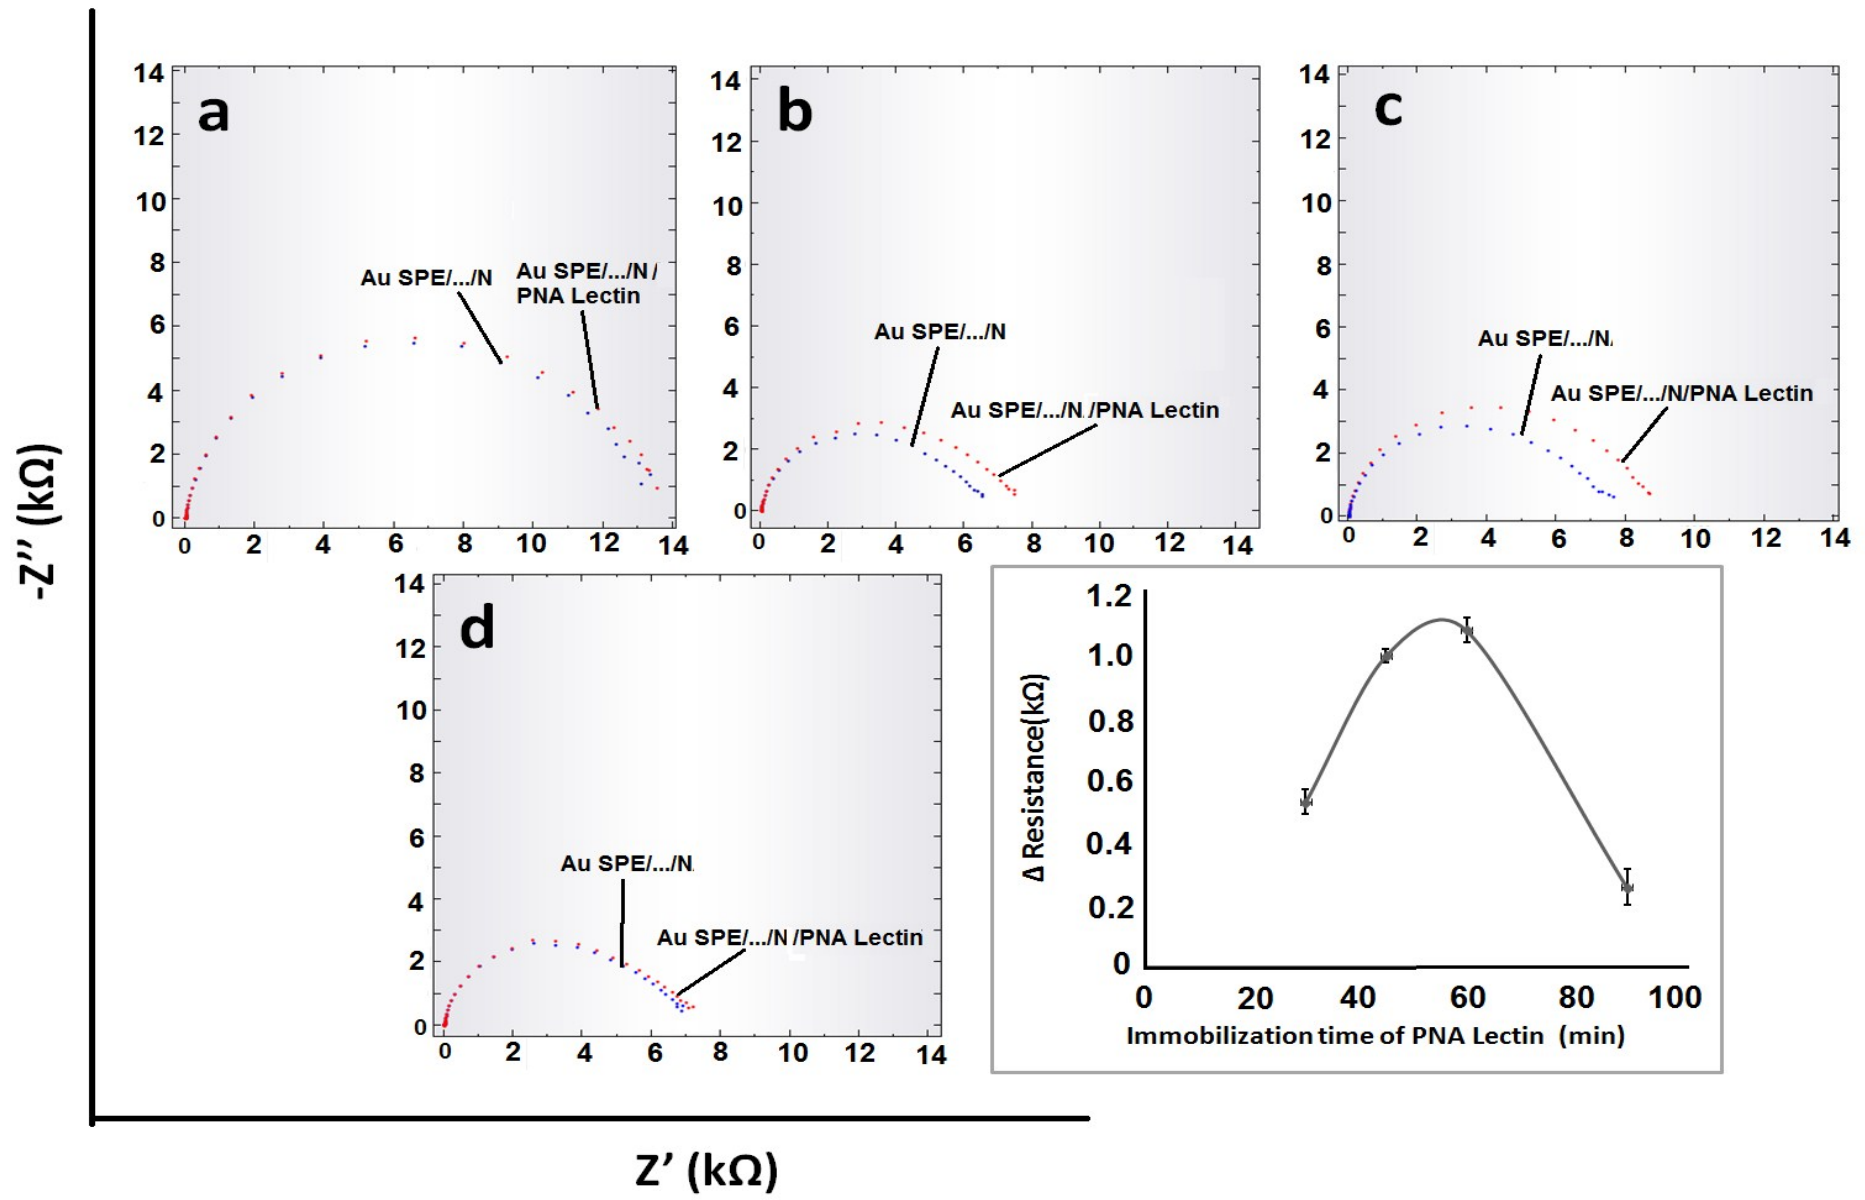

Figure S3. Nyquist plots of different immobilization time of PNA lectin and excel plots; a)30 min, b)45 min, c) 60 min and d)90 min optimization graph of PNA Lectin.

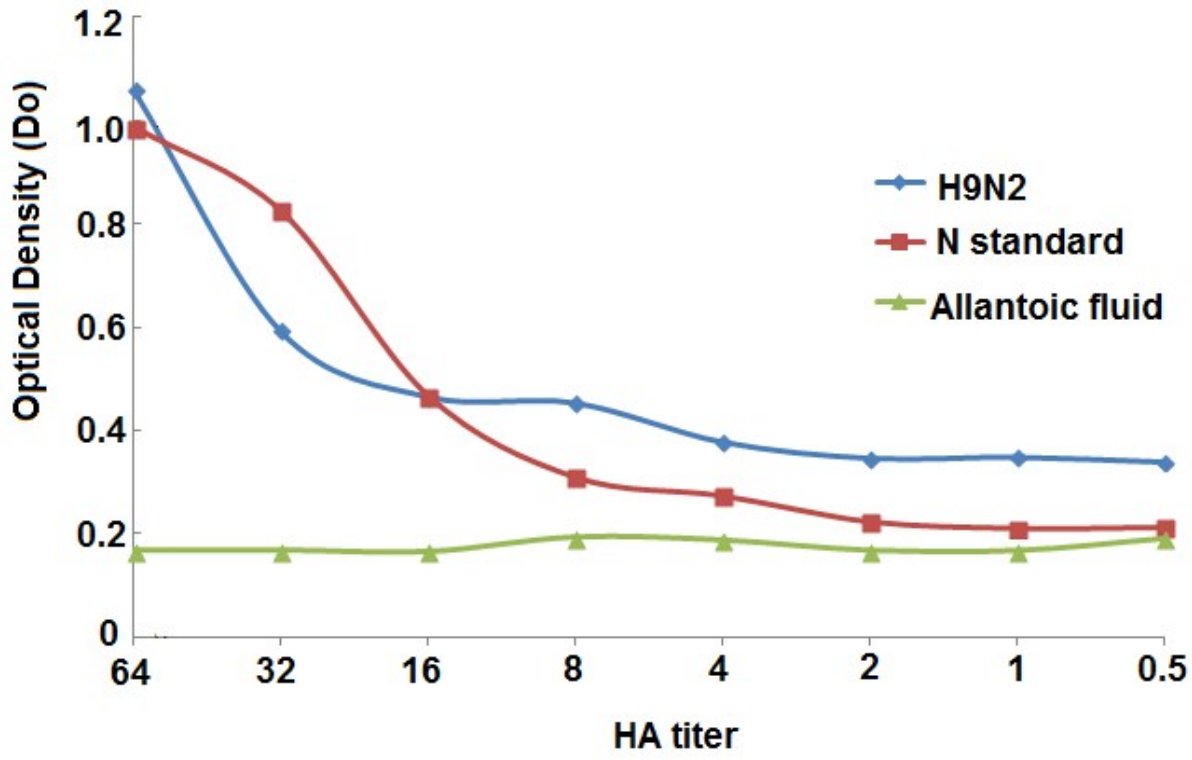

Figure S4. ELLA results of H9N2 influenza virus A, N standard and allantoic fluid in terms of Do.
